# Supplementary material for: Combined Transarterial Chemoembolization and Radiofrequency Ablation for Hepatocellular Carcinoma Infeasible for Ultrasound-Guided Percutaneous Radiofrequency Ablation: A Comparative Study with General Ultrasound-Guided Radiofrequency Ablation Outcomes
Source: MDPI journal article supplement (doi:10.3390/cancers15215193), 2023-10-28
Supplement: s1 [file s1]

**Table S1** Formulas for the albumin-bilirubin score, aspartate aminotransferase/platelet ratio index, “Model for tumor recurrence after living donor liver transplantation” (MoRAL) score, and high risk of microvascular invasion

|             |                                                                                                     |
|-------------|-----------------------------------------------------------------------------------------------------|
| ALBI score  | $[\log 10 \text{ bilirubin } (\mu\text{mol/L}) \times 0.66] + [\text{albumin (g/L)} \times -0.085]$ |
| APRI        | $[\text{AST (IU/L)} / \text{upper limit normal of AST/PLT } (\times 10^9/\text{L})] \times 100$     |
| MoRAL score | $11 \times \sqrt{[\text{PIVKA-II}]} + 2 \times \sqrt{[\text{AFP}]}$                                 |

ALBI, albumin-bilirubin; APRI, aspartate aminotransferase/platelet ratio index; MoRAL, Model for tumor recurrence after living donor liver transplantation.

**Table S2** Scoring system to predict high risk of microvascular invasion

|                                                              |              |
|--------------------------------------------------------------|--------------|
| Serum alpha-fetoprotein level (ng/mL)                        | Points       |
| <15                                                          | 0            |
| ≥15                                                          | 1            |
| Serum protein induced by vitamin K absence-II level (mAU/mL) | Points       |
| <48                                                          | 0            |
| ≥48                                                          | 1            |
| Peritumoral parenchymal enhancement on arterial phase        | Points       |
| (-)                                                          | 0            |
| (+)                                                          | 1.5          |
| Peritumoral hypointensity on hepatobiliary phase             | Points       |
| (-)                                                          | 0            |
| (+)                                                          | 2.5          |
| MVI risk group                                               | Total points |
| MVI-high risk group                                          | ≥ 3.5        |
| MVI-low risk group                                           | < 3.5        |

The MVI prediction score model was calculated by adding the individual points for each of the four factors:  $\alpha$ -FP, PIVKA-II, arterial peritumoral enhancement, and peritumoral hypointensity on HBP [1]. This model for predicting the presence of MVI was externally validated with an area under the receiver operating characteristic curve (AUC) of 0.82 (95% confidence interval [CI]:0.74–0.90), and its sensitivity, specificity, and accuracy were 65.2%, 85.9%, and 81.2%, respectively. In this model, one point is given to  $\alpha$ -FP if  $\geq 15$  ng/mL, one point to PIVKA-II if  $\geq 48$  mAU/mL, 1.5 points if arterial peritumoral enhancement is present, and 2.5 points if peritumoral hypointensity on HBP is present. If the total number of points was  $\geq 3.5$ , it was regarded as MVI-high risk. The predictive presence of MVI could be estimated based on the total MVI score using the results of the previous study.

AFP, alpha-fetoprotein; PIVKA-II, protein induced by vitamin K absence-II; HBP, hepatobiliary phase; MVI, microvascular invasion.

**Table S3** Balance check before and after propensity-score matching for matched variables.

|                                         | Before matching                                     |          | After matching                                     |          |
|-----------------------------------------|-----------------------------------------------------|----------|----------------------------------------------------|----------|
|                                         | TACE+RFA ( <i>n</i> = 24),<br>RFA ( <i>n</i> = 371) |          | TACE+RFA ( <i>n</i> = 21),<br>RFA ( <i>n</i> = 42) |          |
|                                         | SMD                                                 | <i>p</i> | SMD                                                | <i>p</i> |
| *Total bilirubin, mg/dL                 | 0.357                                               | 0.123    | 0.166                                              | 0.591    |
| *Prothrombin time, INR                  | 0.376                                               | 0.092    | −0.090                                             | 0.768    |
| *Platelet count, × 10 <sup>9</sup> /L   | −0.357                                              | 0.102    | 0.017                                              | 0.948    |
| *log(AFP)                               | −0.498                                              | 0.001    | −0.131                                             | 0.727    |
| *Sex                                    | −0.494                                              | 0.006    | 0.000                                              | 1.000    |
| *Cause of liver disease (HBV)           | −0.533                                              | 0.026    | −0.047                                             | 0.865    |
| *Cause of liver disease (HCV)           | 0.291                                               | 0.230    | 0.055                                              | 0.857    |
| *Cause of liver disease (alcohol)       | 0.415                                               | 0.102    | −0.066                                             | 0.792    |
| *Cause of liver disease (others)        | −0.045                                              | 0.827    | 0.109                                              | 0.686    |
| *Periportal vein tumor location         | 0.452                                               | 0.089    | −0.066                                             | 0.816    |
| *Washout appearance (on PVP)            | −0.386                                              | 0.073    | 0.148                                              | 0.610    |
| *Enhancing capsule                      | −0.459                                              | 0.025    | −0.178                                             | 0.560    |
| *LR-3                                   | 0.649                                               | 0.008    | −0.047                                             | 0.873    |
| *LR-4                                   | 0.043                                               | 0.846    | −0.118                                             | 0.686    |
| *LR-5                                   | −0.419                                              | 0.045    | 0.109                                              | 0.686    |
| *LR-M                                   | −0.410                                              | 0.011    | 0.109                                              | 0.686    |
| *Non-smooth tumor margin                | −0.519                                              | 0.004    | 0.079                                              | 0.792    |
| Age                                     | −0.120                                              | 0.588    | −0.261                                             | 0.424    |
| Albumin, g/dL                           | −0.304                                              | 0.159    | 0.076                                              | 0.812    |
| ALBI grade 1                            | −0.203                                              | 0.359    | 0.191                                              | 0.508    |
| ALBI grade 2                            | 0.238                                               | 0.287    | −0.096                                             | 0.742    |
| AST, U/L                                | −0.141                                              | 0.299    | −0.269                                             | 0.483    |
| APRI                                    | 0.195                                               | 0.425    | 0.081                                              | 0.722    |
| Child–Pugh classification grade         | −0.123                                              | 0.521    | −0.436                                             | 0.153    |
| PIVKA-II, mAU/mL                        | 0.177                                               | 0.409    | −0.085                                             | 0.828    |
| MoRAL score (>68)                       | −0.108                                              | 0.609    | 0.049                                              | 0.865    |
| Tumor size (cm)                         | 0.074                                               | 0.743    | 0.142                                              | 0.589    |
| Perihepatic vein tumor location         | −0.191                                              | 0.294    | −0.327                                             | 0.425    |
| Non-subphrenic subcapsular location     | 0.100                                               | 0.651    | 0.000                                              | 1.000    |
| Subphrenic location                     | 0.178                                               | 0.438    | 0.436                                              | 0.096    |
| Non-subcapsular location                | −0.224                                              | 0.310    | −0.376                                             | 0.203    |
| No non-rim APHE                         | 0.203                                               | 0.416    | −0.109                                             | 0.755    |
| Non-rim APHE                            | 0.044                                               | 0.833    | −0.079                                             | 0.792    |
| Rim APHE                                | −0.243                                              | 0.165    | 0.218                                              | 0.318    |
| Peripheral washout appearance           | −0.147                                              | 0.045    | 0.000                                              | 1.000    |
| Progressive centripetal enhancement     | −0.269                                              | 0.000    | 0.000                                              | 1.000    |
| Transitional phase targetoid appearance | −0.223                                              | 0.003    | 0.000                                              | 1.000    |
| HBP targetoid appearance                | −0.258                                              | 0.000    | 0.000                                              | 1.000    |
| DWI targetoid appearance                | −0.153                                              | 0.413    | 0.109                                              | 0.686    |
| Non-targetoid LR-M features             | −0.410                                              | 0.011    | 0.109                                              | 0.686    |
| Arterial peritumoral hyperenhancement   | −0.335                                              | 0.068    | −0.546                                             | 0.178    |
| HBP peritumoral hypointensity           | −0.172                                              | 0.350    | −0.109                                             | 0.755    |
| Signal intensity of tumor on HBP        | 0.282                                               | 0.268    | −0.133                                             | 0.708    |
| MVI-high risk                           | −0.172                                              | 0.350    | 0.000                                              | 1.000    |

Standardized mean differences indicate very small differences for values less than 0.10; 0.1–0.3, small differences; 0.3–0.5, moderate differences; and values higher than 0.5, large differences.

INR, international normalized ratio; AFP, alpha-fetoprotein; HBV, hepatitis B virus; HCV, hepatitis C virus; PVP, portal venous phase; LR, LI-RADS, Liver Imaging Reporting and Data System category; ALBI grade, albumin-bilirubin grade; AST, aspartate aminotransferase; APRI, AST/platelet ratio index; PIVKA-II, protein induced by vitamin K absence-II; MoRAL score, Model for Tumor Recurrence After Living Donor Liver Transplantation

score; APHE, arterial phase hyperenhancement; DWI, diffusion weighted images; HBP, hepatobiliary phase; MVI, microvascular invasion; SMD, standard mean difference; TACE, transarterial chemoembolization; RFA, radiofrequency ablation.

\* Variables used for propensity score matching.

**Table S4** Inter-reader agreement of the imaging findings

| Variables                          | Kappa | 95% CI      |
|------------------------------------|-------|-------------|
| Non-rim arterial hyperenhancement  | 0.834 | 0.704–0.964 |
| Washout appearance                 | 0.771 | 0.710–0.832 |
| Enhancing capsule                  | 0.642 | 0.566–0.717 |
| LR-M                               | 0.758 | 0.681–0.835 |
| Peri-tumoral enhancement           | 0.661 | 0.570–0.753 |
| Non-smooth margin                  | 0.650 | 0.566–0.734 |
| Peritumoral hypointensity          | 0.682 | 0.557–0.807 |
| Low SI on HBP (reference=iso/high) | 0.859 | 0.736–0.981 |

A  $\kappa$  value of 0.01–0.20 was interpreted as slight, 0.21–0.40 as fair, 0.41–0.60 as moderate, 0.61–0.80 as substantial, and 0.81–1.00 as excellent agreement

## REFERENCES

1. Lee, S.; Kang, T.W.; Song, K.D.; Lee, M.W.; Rhim, H.; Lim, H.K.; Kim, S.Y.; Sinn, D.H.; Kim, J.M.; Kim, K.; et al. Effect of Microvascular Invasion Risk on Early Recurrence of Hepatocellular Carcinoma After Surgery and Radiofrequency Ablation. *Ann. Surg.* **2021**, *273*, 564-571.
